# Supplementary material for: Sexual versus Asexual Reproduction: Distinct Outcomes in Relative Abundance of Parthenogenetic Mealybugs following Recent Colonization
Source: PubMed Central journal article supplement (PMC4920589; doi:10.1371/journal.pone.0156587), 2016-06-20

### (a) Sexual lineage

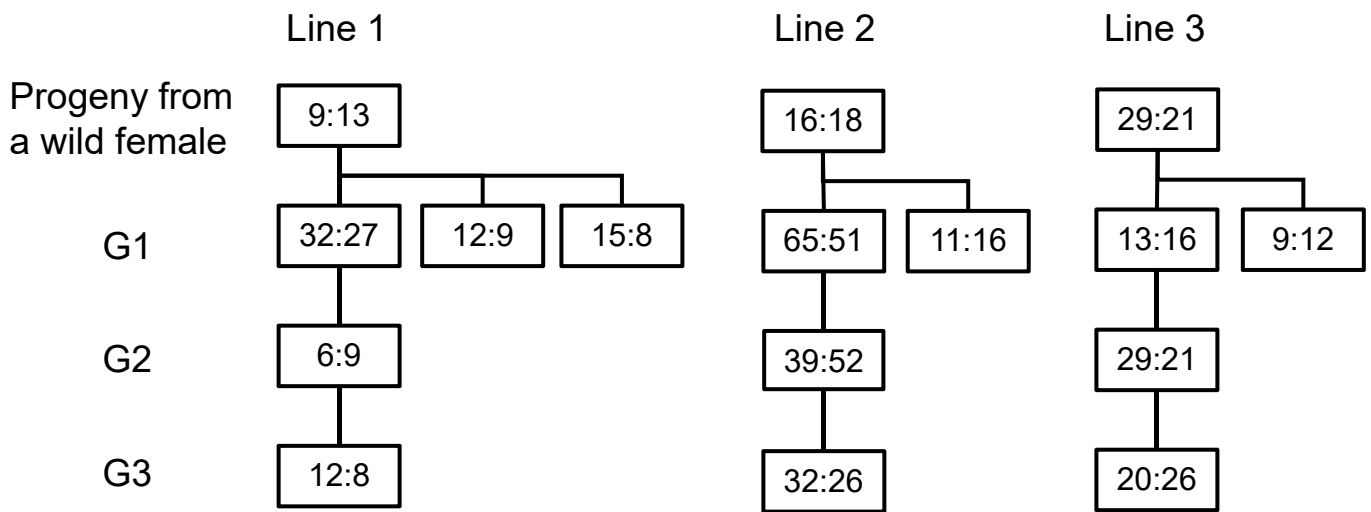

### (b) Asexual lineage

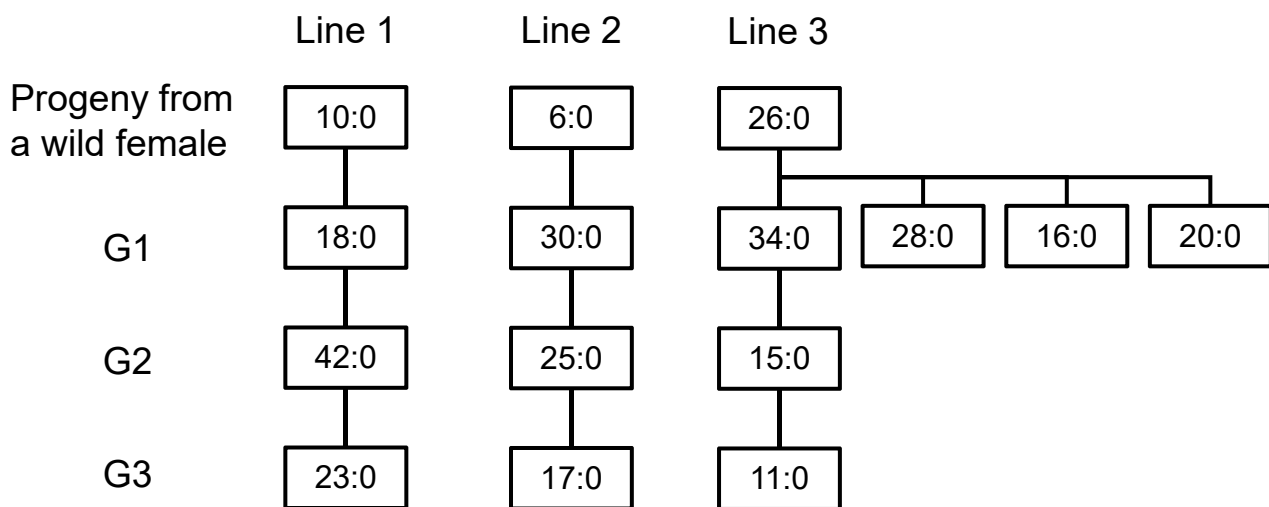

Supplement: pone.0156587.s001.pdf [file pone.0156587.s001.pdf]
