# Supplementary material for: Sexual versus Asexual Reproduction: Distinct Outcomes in Relative Abundance of Parthenogenetic Mealybugs following Recent Colonization
Source: PubMed Central journal article supplement (PMC4920589; doi:10.1371/journal.pone.0156587), 2016-06-20
Supplement: pone.0156587.s002.pdf [file pone.0156587.s002.pdf]

**S1 Table. Performances in development and reproduction of the sexual and the asexual lineages of *Dysmicoccus brevipes*.**

| Code  | Lineage | Sex    | Development time<br>(day) | Pre- parturition<br>duration (day) | Parturition duration<br>(day) | Number of offspring<br>(% females) |
|-------|---------|--------|---------------------------|------------------------------------|-------------------------------|------------------------------------|
| SF-01 | Sexual  | Female | 28                        | 22                                 | 18                            | 71 (40.8)                          |
| SF-02 | Sexual  | Female | 28                        | 21                                 | 30                            | 111 (54.0)                         |
| SF-03 | Sexual  | Female | 27                        | 23                                 | 48                            | 197 (33.5)                         |
| SF-04 | Sexual  | Female | 27                        | 23                                 | 18                            | 119 (65.5)                         |
| SF-05 | Sexual  | Female | 21                        | 27                                 | 14                            | 61 (42.6)                          |
| SF-06 | Sexual  | Female | 27                        | 22                                 | 22                            | 69 (59.4)                          |
| SF-07 | Sexual  | Female | 27                        | 22                                 | 48                            | 221 (47.1)                         |
| SF-08 | Sexual  | Female | 27                        | 22                                 | 30                            | 145 (52.4)                         |
| SF-09 | Sexual  | Female | 27                        | 22                                 | 22                            | 48 (60.4)                          |
| SF-10 | Sexual  | Female | 27                        | 22                                 | 18                            | 77 (33.8)                          |
| SF-11 | Sexual  | Female | 27                        | 22                                 | 30                            | 112 (41.1)                         |
| SF-12 | Sexual  | Female | 27                        | 22                                 | 47                            | 104 (21.2)                         |
| SF-13 | Sexual  | Female | 27                        | 22                                 | 48                            | 108 (45.4)                         |
| SF-14 | Sexual  | Female | 28                        | 22                                 | 44                            | 120 (49.2)                         |
| SF-15 | Sexual  | Female | 28                        | 22                                 | 44                            | 98 (22.4)                          |
| SF-16 | Sexual  | Female | 23                        | 16                                 | 22                            | 75 (42.7)                          |
| SF-17 | Sexual  | Female | 23                        | 22                                 | 47                            | 69 (43.5)                          |
| SF-18 | Sexual  | Female | 24                        | 22                                 | 29                            | 165 (53.9)                         |
| SF-19 | Sexual  | Female | 23                        | 19                                 | 22                            | 109 (38.5)                         |
| SF-20 | Sexual  | Female | 23                        | 22                                 | 26                            | 155 (45.8)                         |
| SF-21 | Sexual  | Female | 23                        | 22                                 | 26                            | 142 (40.8)                         |
| SF-22 | Sexual  | Female | 23                        | 22                                 | 27                            | 121 (44.6)                         |
| SF-23 | Sexual  | Female | 23                        | 22                                 | 23                            | 103 (42.7)                         |
| SF-24 | Sexual  | Female | 23                        | 22                                 | 20                            | 107 (43.9)                         |
| SF-25 | Sexual  | Female | 23                        | 22                                 | 17                            | 98 (59.2)                          |
| SF-26 | Sexual  | Female | 26                        | 22                                 | 23                            | 199 (37.2)                         |
| SF-27 | Sexual  | Female | 26                        | 22                                 | 26                            | 131 (46.6)                         |
| SF-28 | Sexual  | Female | 26                        | 22                                 | 29                            | 105 (41.9)                         |
| SF-29 | Sexual  | Female | 26                        | 22                                 | 22                            | 89 (64.0)                          |

|       |         |        |    |    |    |            |
|-------|---------|--------|----|----|----|------------|
| SF-30 | Sexual  | Female | 26 | 22 | 21 | 134 (40.3) |
| SF-31 | Sexual  | Female | 25 | 22 | 24 | 103 (54.4) |
| SF-32 | Sexual  | Female | 25 | 22 | 27 | 124 (77.4) |
| SF-33 | Sexual  | Female | 25 | 22 | 22 | 99 (36.4)  |
| SM-01 | Sexual  | Male   | 23 | -  | -  | -          |
| SM-02 | Sexual  | Male   | 24 | -  | -  | -          |
| SM-03 | Sexual  | Male   | 24 | -  | -  | -          |
| SM-04 | Sexual  | Male   | 24 | -  | -  | -          |
| SM-05 | Sexual  | Male   | 25 | -  | -  | -          |
| SM-06 | Sexual  | Male   | 27 | -  | -  | -          |
| SM-07 | Sexual  | Male   | 27 | -  | -  | -          |
| SM-08 | Sexual  | Male   | 24 | -  | -  | -          |
| SM-09 | Sexual  | Male   | 23 | -  | -  | -          |
| SM-10 | Sexual  | Male   | 23 | -  | -  | -          |
| SM-11 | Sexual  | Male   | 24 | -  | -  | -          |
| SM-12 | Sexual  | Male   | 24 | -  | -  | -          |
| SM-13 | Sexual  | Male   | 25 | -  | -  | -          |
| SM-14 | Sexual  | Male   | 24 | -  | -  | -          |
| SM-15 | Sexual  | Male   | 24 | -  | -  | -          |
| PF-01 | Asexual | Female | 21 | 33 | 20 | 148 (100)  |
| PF-02 | Asexual | Female | 25 | 44 | 24 | 124 (100)  |
| PF-03 | Asexual | Female | 25 | 35 | 24 | 97 (100)   |
| PF-04 | Asexual | Female | 22 | 35 | 24 | 69 (100)   |
| PF-05 | Asexual | Female | 23 | 42 | 22 | 21 (100)   |
| PF-06 | Asexual | Female | 22 | 30 | 16 | 145 (100)  |
| PF-07 | Asexual | Female | 25 | 37 | 25 | 89 (100)   |
| PF-08 | Asexual | Female | 21 | 42 | 26 | 154 (100)  |
| PF-09 | Asexual | Female | 21 | 44 | 19 | 149 (100)  |
| PF-10 | Asexual | Female | 25 | 33 | 20 | 51 (100)   |
| PF-11 | Asexual | Female | 23 | 30 | 24 | 154 (100)  |
| PF-12 | Asexual | Female | 21 | 33 | 24 | 79 (100)   |
| PF-13 | Asexual | Female | 29 | 34 | 24 | 139 (100)  |
| PF-14 | Asexual | Female | 25 | 27 | 22 | 119 (100)  |
| PF-15 | Asexual | Female | 26 | 34 | 16 | 62 (100)   |
| PF-16 | Asexual | Female | 19 | 42 | 25 | 78 (100)   |

|       |         |        |    |    |    |           |
|-------|---------|--------|----|----|----|-----------|
| PF-17 | Asexual | Female | 30 | 32 | 26 | 149 (100) |
| PF-18 | Asexual | Female | 28 | 22 | 19 | 55 (100)  |
| PF-19 | Asexual | Female | 28 | 33 | 19 | 148 (100) |
| PF-20 | Asexual | Female | 25 | 35 | 22 | 124 (100) |
| PF-21 | Asexual | Female | 23 | 34 | 27 | 149 (100) |
